# Supplementary material for: In situ growth of an Fe-doped NiCo-MOF electrocatalyst from layered double hydroxide effectively enhances electrocatalytic oxygen evolution performance
Source: Royal Society of Chemistry journal article supplement (doi:10.1039/d1ce01220g), 2021-01-01
Supplement: d1ce01220g1.pdf [file d1ce01220g1.pdf]

## Electronic Supplementary Information

### ***In-situ* growth of an Fe doped NiCo-MOF electrocatalyst from layered double hydroxide effectively enhances electrocatalytic oxygen evolution performance**

Tingting Sun<sup>a,b</sup>, Shuangyan Lin<sup>b,\*</sup>, Zhikun Xu<sup>c,\*</sup>, Lin Li<sup>a,\*</sup>

<sup>a</sup> *Key Laboratory for Photonic and Electronic Bandgap Materials, Ministry of Education, School of Physics and Electronic Engineering, Harbin Normal University, Harbin 150025, PR China*

<sup>b</sup> *School of Chemistry, Guangdong University of Petrochemical Technology, Maoming, Guangdong 525000, PR China*

<sup>c</sup> *School of Science, Guangdong University of Petrochemical Technology, Maoming, Guangdong 525000, PR China*

\*Corresponding author.

E-mail address: [linshyan123@163.com](mailto:linshyan123@163.com) (Lin S.)

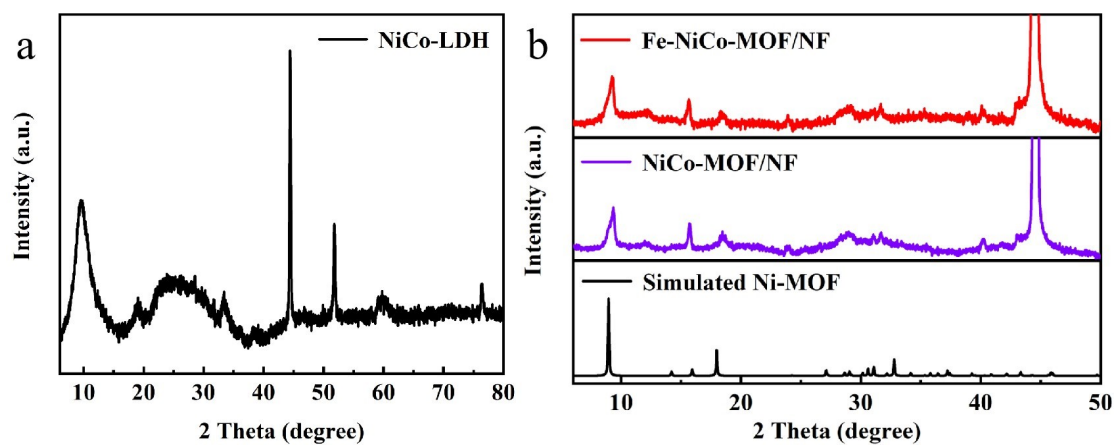

**Figure S1:** XRD patterns of a) NiCo-LDH/NF, b) Fe-NiCo-MOF/NF and NiCo-MOF/NF.

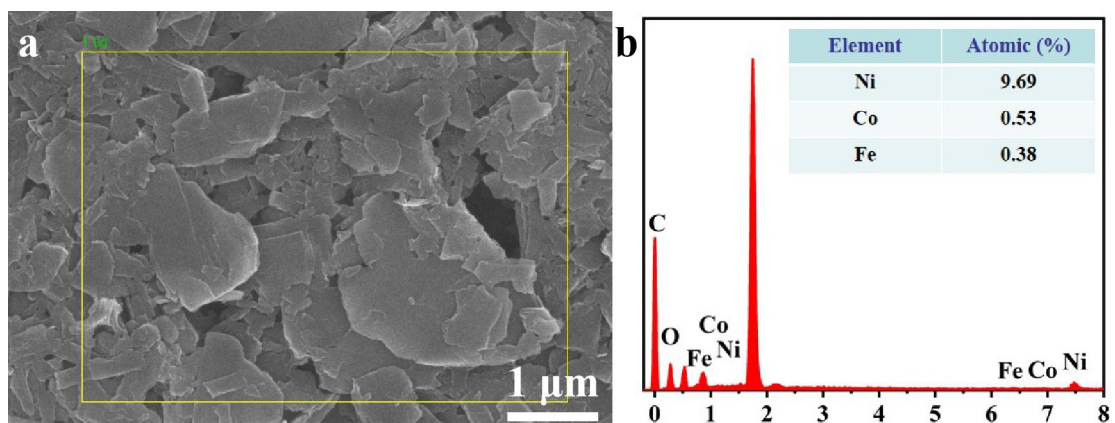

**Figure S2:** SEM image and EDX acquired from highlighted location of Fe-NiCo-MOF. Inset: table of elemental composition.

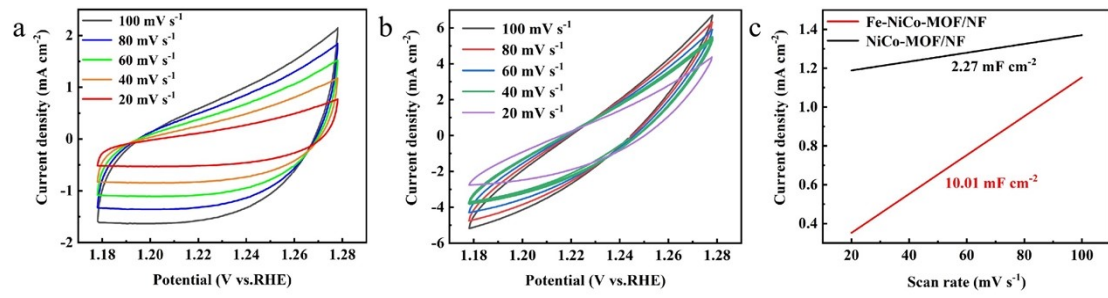

**Figure S3:** Electric double layer capacitance measurements of (a) Fe-NiCo-MOF/NF (b) NiCo-MOF/NF and (c)  $C_{dl}$  calculations of Fe-NiCo-MOF/NF and NiCo-MOF/NF.

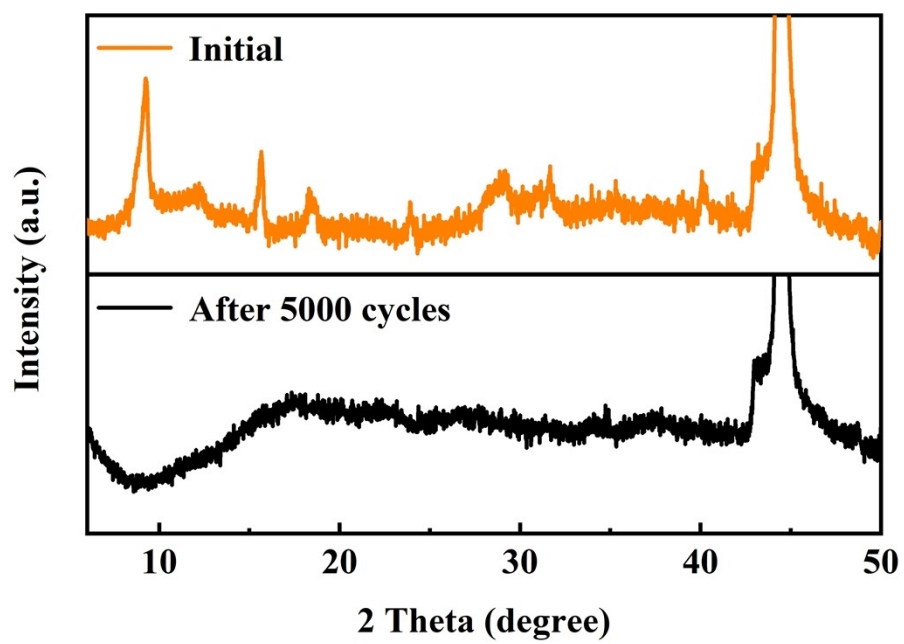

**Figure S4:** XRD patterns of Fe-NiCo-MOF/NF initial and after 5000 CV cycles

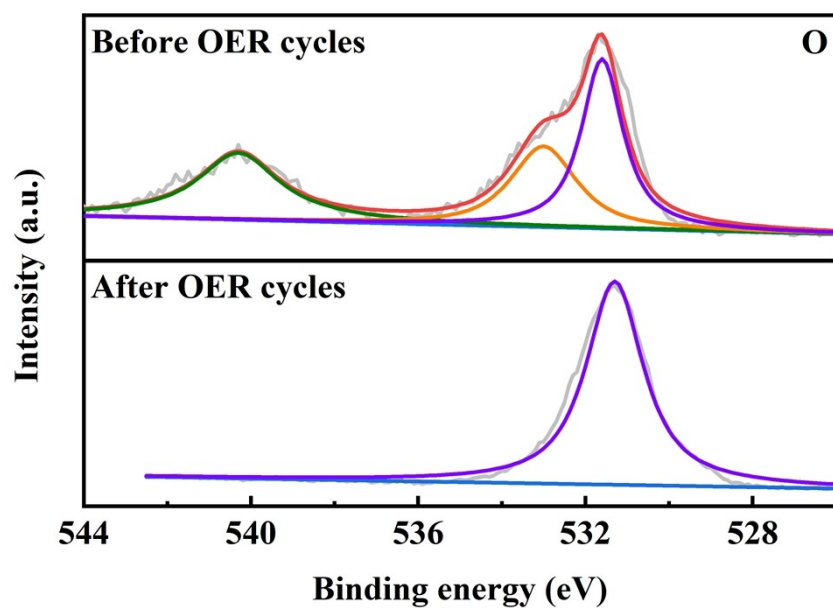

**Figure S5:** High-resolution O 1s XPS spectra of Fe-NiCo-MOF/NF before and after 5000 cycles.
